# Supplementary material for: Potential Wound Healing of PLGA Nanoparticles Containing a Novel L‐Carnitine–GHK Peptide Conjugate
Source: Hindawi journal article supplement (doi:10.1155/2022/6165759), 2022-01-01
Supplement: f1 [file 6165759.f1.docx]

**Supporting Information**

**Title:** Potential wound healing of PLGA Nanoparticles containing a novel L-Carnitine-GHK peptide conjugate

**Authors:**

Sorour Ramezanpour*1, Pedram Tavatoni1, Mohammad Akrami*2,3, Mona Navaei-Nigjeh,2,4 Pezhman Shiri1

1 Department of Chemistry, K. N. Toosi University of Technology, P.O. Box 15875-4416 Tehran, Iran.

2 Department of Pharmaceutical Biomaterials, and Medical Biomaterials Research Center, Faculty of Pharmacy, Tehran University of Medical Sciences, Tehran, Iran.

3 Institute of Biomaterials, University of Tehran & Tehran University of Medical Sciences (IBUTUMS), Tehran, Iran.

4 The Institute of Pharmaceutical Sciences (TIPS), Tehran University of Medical Sciences, Tehran, Iran.

Corresponding authors**:** Sorour Ramezanpour Email: [ramezanpour@kntu.ac.ir](mailto:ramezanpour@kntu.ac.ir), Mohammad Akrami Email: [m-akrami@sina.tums.ac.ir](mailto:m-akrami@sina.tums.ac.ir)


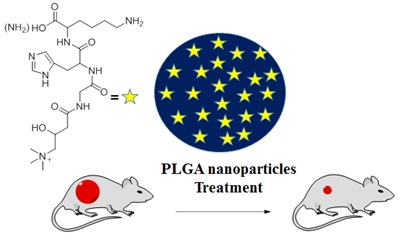


Graphical abstract


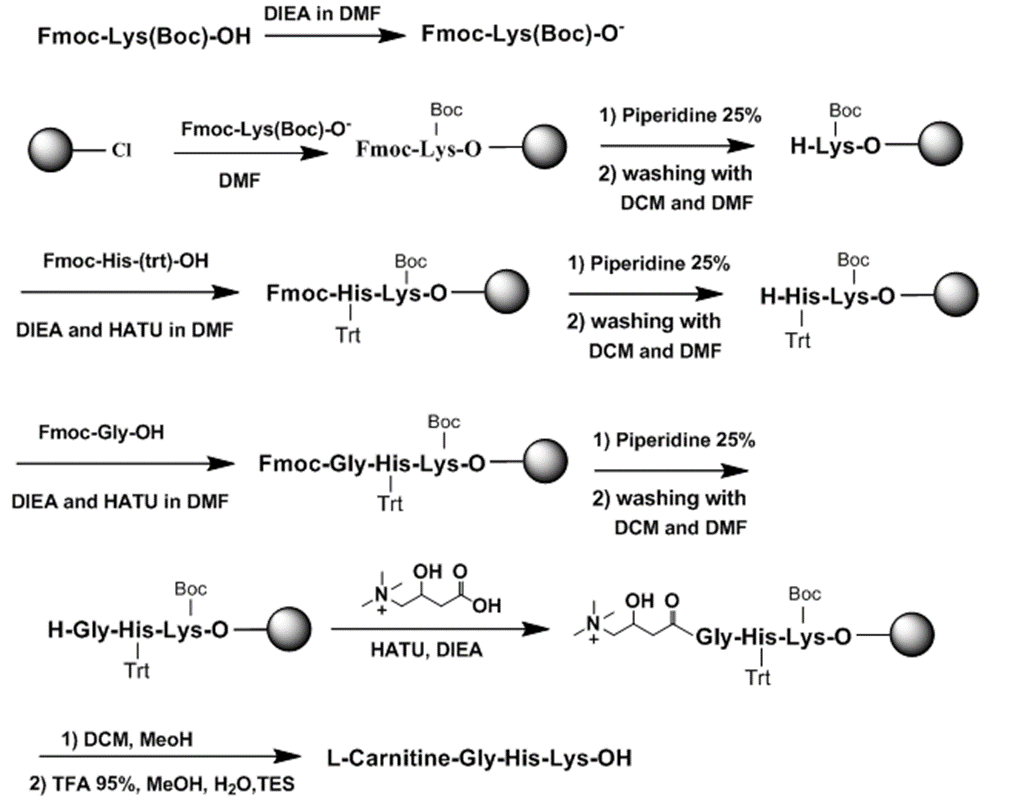


Scheme S1. Solid phase Synthesis of L-Carnitine-GHK

Fig S1. Analytical HPLC chromatogram of GHK


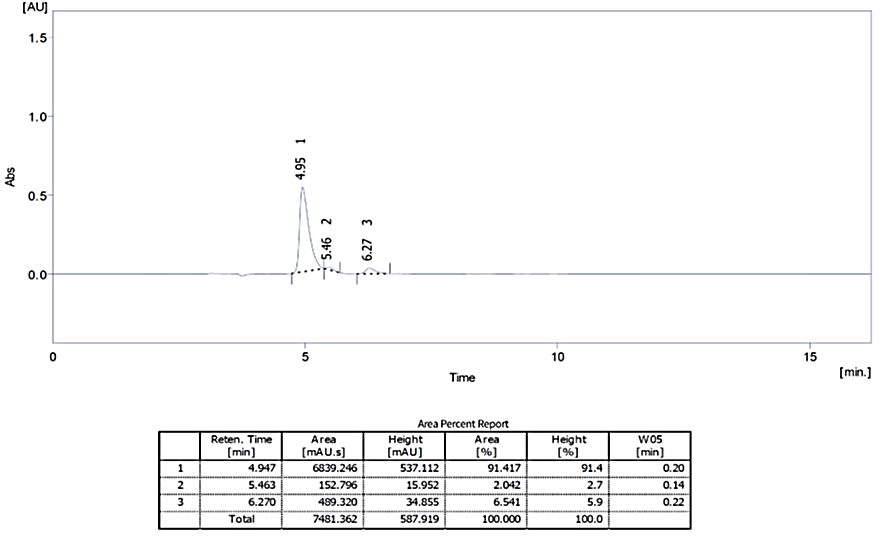


Fig S2. HPLC chromatogram of GHK-L-Carnitine


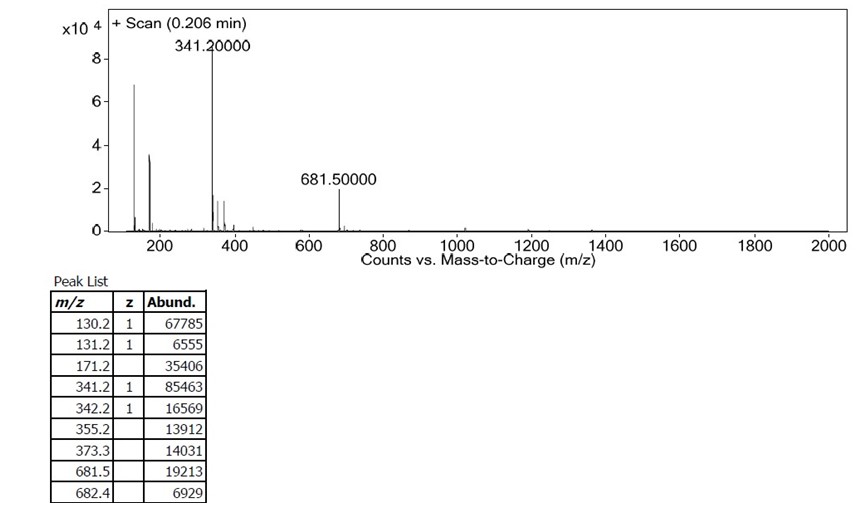


Fig S3. ESI-MS Spectra of GHK-OH


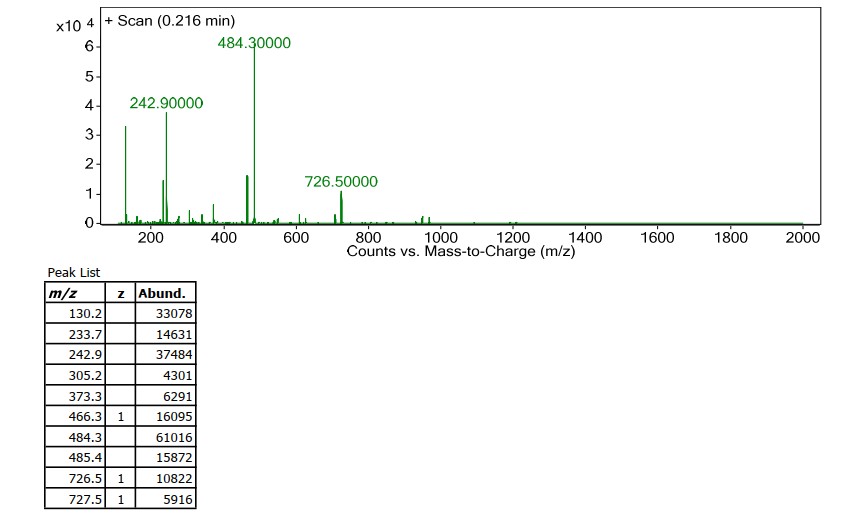


Fig S4. ESI-MS Spectra of L-Carnitine-GHK-OH

**
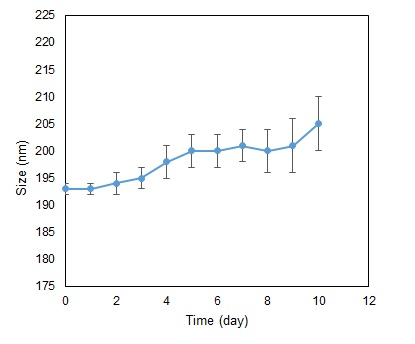
**

Fig S5. Tracking the stability of nanoparticles through size measurement using Zeta sizer

**
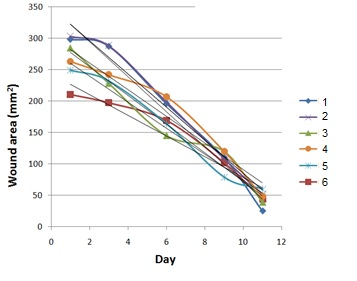
**

Fig S6. Representation of wound healing trends in the whole treatment period: 1- Conjugate loaded PLGA NPs; 2-

GHK- L-Carnitine conjugate; 3- GHK; 4- PLGA; 5- L-Carnitine; 6- Untreated. Ruler units are in mm.
